# Supplementary material for: Whole-genome sequencing identifies functional noncoding variation in SEMA3C that cosegregates with dyslexia in a multigenerational family
Source: Springer Nature journal article supplement (doi:10.1007/s00439-021-02289-w), 2021-06-02
Supplement: MOESM2 [file 439_2021_2289_MOESM2_ESM.pdf]

## Supplementary Figures

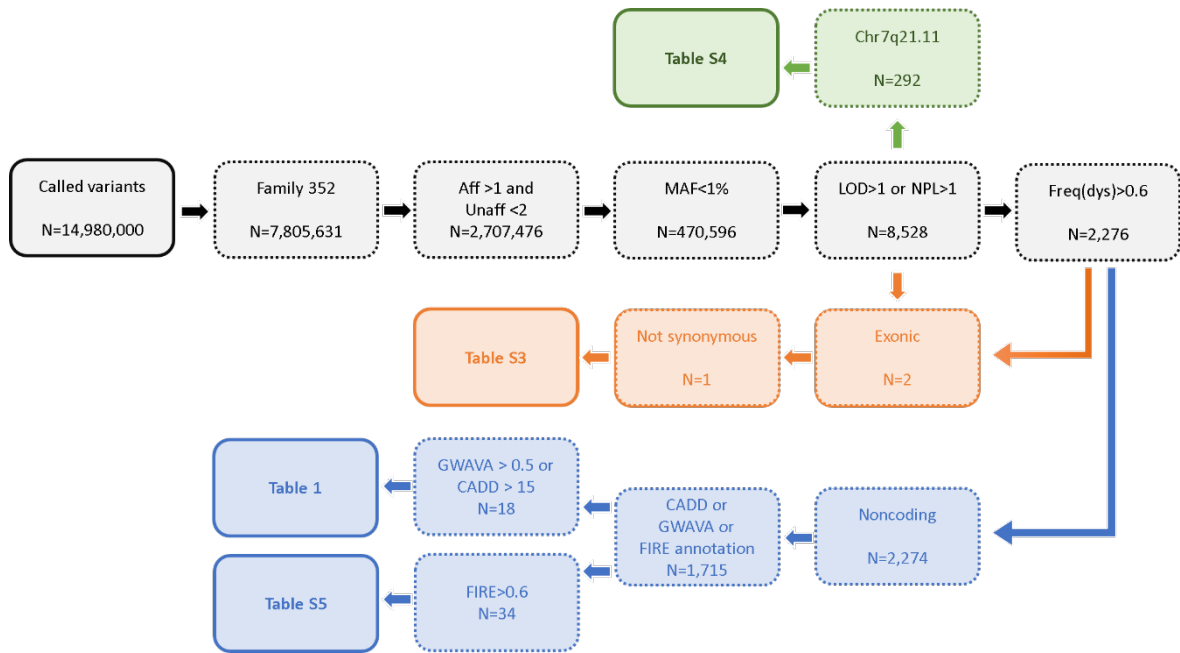

**Fig S1. WGS filtering diagram.** Dotted squares indicate the applied filters. Solid squares indicate the starting variant calls (black) and the final tables for the exonic (orange) and noncoding (blue) variants.

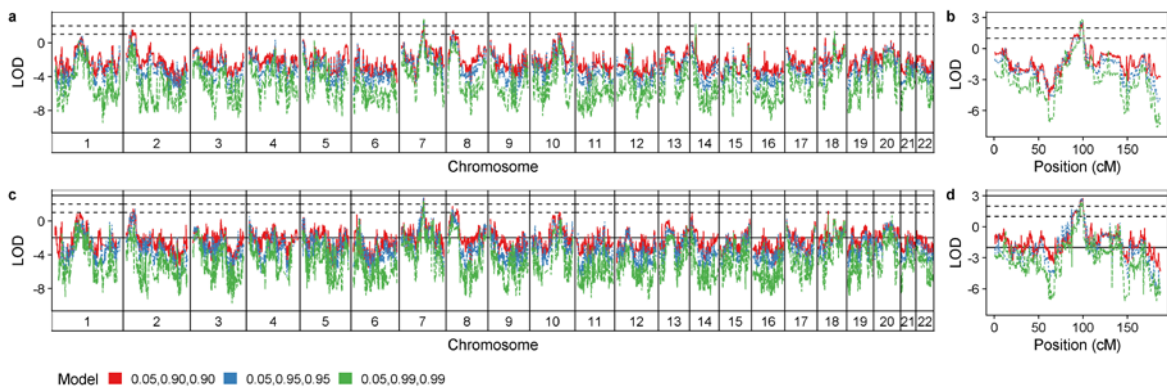

**Fig S2. Sensitivity analysis of parametric dominant linkage.** **a)** and **b)** map bin-size: 0.5 cM, **c)** and **d)** map bin-size: 0.3 cM. Colours indicate models with different penetrances for wild-type, heterozygous, and homozygous allele carriers: red (0.05,0.90,0.90), blue (0.05,0.95,0.95) and green (0.05,0.99,0.99). All autosomal chromosomes are shown in **a** and **c**, and chromosome 7 is shown in **b** and **d**.

Whole Genome Sequencing Identifies Functional Noncoding Variation in *SEMA3C* that Co-segregates with Dyslexia in a Multigenerational Family

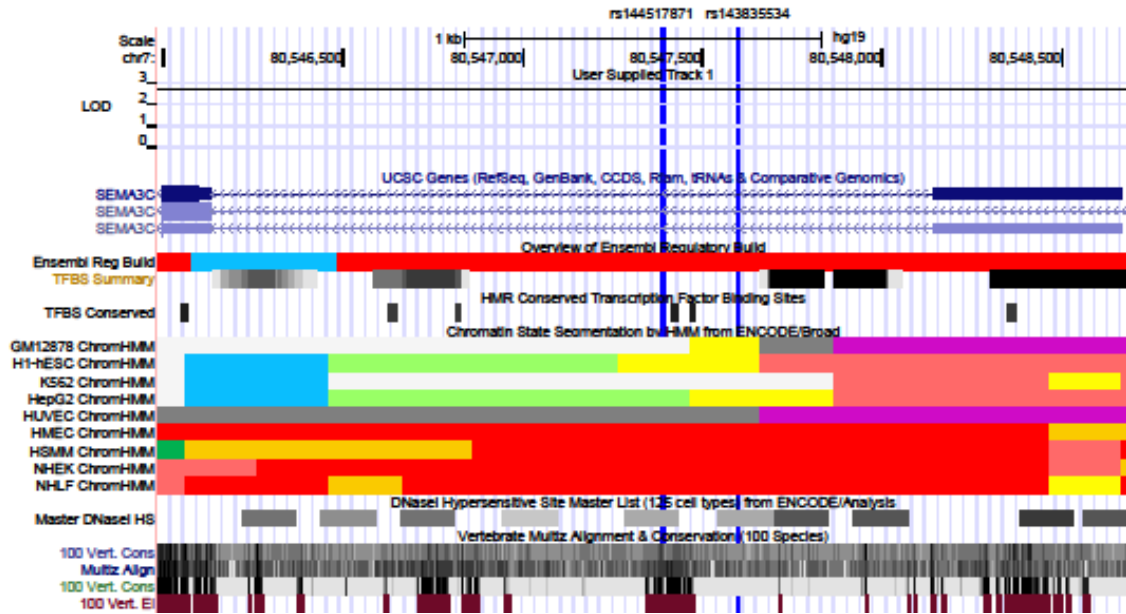

**Fig S3.** Detailed annotation of the genomic region first intron of *SEMA3C* using the UCSC Genome Browser (hg19). The variants rs144517871 and rs143835534 are marked in blue. Tracks for ENCODE digital DNaseI HS hypersensitivity clusters, transcription factor binding sites, ENCODE/Broad chromatin state segmentation by HMM in several cell lines, as well as 100 Vertebrate conservation scores (PhyloP, PhansCons, Conserved elements) and sequence alignment (Multiz Alignments of 100 Vertebrates) are included.

Whole Genome Sequencing Identifies Functional Noncoding Variation in *SEMA3C* that Co-segregates with Dyslexia in a Multigenerational Family

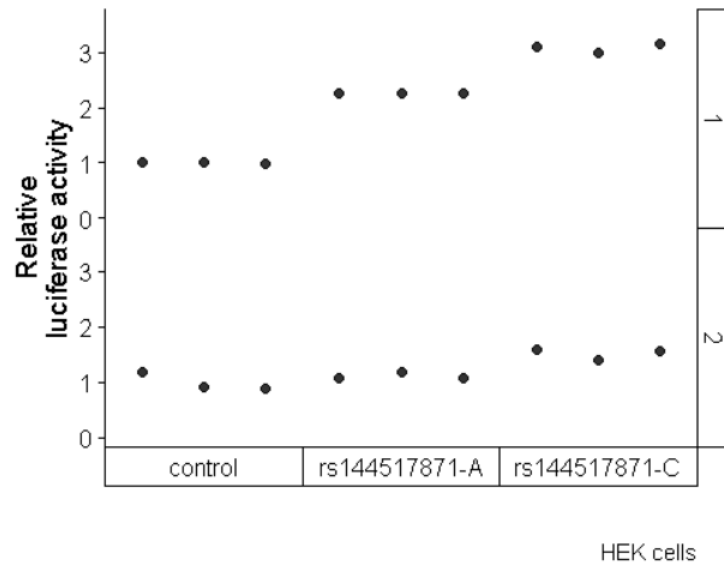

**Fig S4. Luciferase reporter assays in HEK cells.** Luciferase reporter vector containing a minimal promoter (control) or *SEMA3C* promoter containing either the common allele (rs144517871-A) or the rare allele (rs144517871-C) were transfected into HEK cells. Luciferase expression was measured and data are shown as relative ratio to the control construct. The two panels (1 and 2) indicate independent experimental replicates.

# Whole Genome Sequencing Identifies Functional Noncoding Variation in *SEMA3C* that Co-segregates with Dyslexia in a Multigenerational Family

Query SNP: [rs144517871](#) and variants with  $r^2 \geq 0.2$

| pos (hg19)    | pos (hg38)    | LD (r <sup>2</sup> ) | LD (D') | variant                     | Ref Alt | AFR freq | AMR freq | ASN freq | EUR freq | SiPhy cons | Promoter histone marks                                                                          | Enhancer histone marks              | DNAse             | Proteins bound | eQTL tissues | Motifs changed                       | Drivers disrupted | GENCODE genes     | dbSNP func annot |
|---------------|---------------|----------------------|---------|-----------------------------|---------|----------|----------|----------|----------|------------|-------------------------------------------------------------------------------------------------|-------------------------------------|-------------------|----------------|--------------|--------------------------------------|-------------------|-------------------|------------------|
| chr7:80387225 | chr7:80757909 | 0.22                 | 0.62    | <a href="#">rs192757316</a> | T       | G        | 0.00     | 0.00     | 0.00     | 0.02       |                                                                                                 |                                     |                   |                |              | ERalpha-a,TLX1::NFIC                 |                   | SEMA3C            | intronic         |
| chr7:80406219 | chr7:80776903 | 0.4                  | 0.75    | <a href="#">rs142143424</a> | T       | C        | 0.00     | 0.00     | 0.00     | 0.01       |                                                                                                 | BRST                                |                   |                |              | Amt,BHLHE40,XBP-1                    |                   | SEMA3C            | intronic         |
| chr7:80452285 | chr7:80822969 | 0.24                 | 0.49    | <a href="#">rs149488275</a> | C       | T        | 0.00     | 0.00     | 0.00     | 0.01       |                                                                                                 | ESDR, BRST, GI, KID, LNG            | MUS,MUS           |                |              | Foxl1,Hoxa10,Hoxa9,NF-AT,Pou1f1,STAT |                   | SEMA3C            | intronic         |
| chr7:80547391 | chr7:80918075 | 1                    | 1       | <a href="#">rs144517871</a> | A       | C        | 0.00     | 0.00     | 0.00     | 0.01       | ESDR, ESC, LNG, IPSC, FAT, STRM, BRST, BLD, MUS, SKIN, VAS, BRN, GI, KID, HRT, OVRY, BONE       | ESC, IPSC, BLD, BRN, HRT, LNG, CRVX | BRN,MUS,MUS,BRST  |                |              | GR,Pou2f2,Pou5f1,ZEB1                |                   | SEMA3C            | intronic         |
| chr7:80547575 | chr7:80918259 | 1                    | 1       | <a href="#">rs143835534</a> | T       | C        | 0.00     | 0.00     | 0.00     | 0.01       | ESC, ESDR, LNG, IPSC, FAT, STRM, BRST, BLD, MUS, SKIN, VAS, BRN, GI, KID, HRT, OVRY, CRVX, BONE | ESC, IPSC, HRT, LNG                 | ESDR,LNG,MUS,CRVX |                |              | GATA,GR,Pax-4                        |                   | SEMA3C            | intronic         |
| chr7:80573237 | chr7:80943921 | 0.25                 | 1       | <a href="#">rs190412691</a> | T       | C        | 0.00     | 0.00     | 0.01     | 0.00       |                                                                                                 | LNG, BRST, BLD, SKIN                |                   |                |              |                                      |                   | 22kb 5' of SEMA3C |                  |
| chr7:80583080 | chr7:80953764 | 0.5                  | 1       | <a href="#">rs182566272</a> | C       | G        | 0.00     | 0.00     | 0.00     | 0.01       |                                                                                                 |                                     |                   |                |              | Cdx2,Hoxa10,Hoxd10,Sox,VDR           |                   | 31kb 5' of SEMA3C |                  |
| chr7:80607490 | chr7:80978174 | 0.25                 | 1       | <a href="#">rs146727624</a> | G       | A        | 0.00     | 0.01     | 0.00     | 0.00       |                                                                                                 |                                     |                   |                |              | AP-1,CIZ,Ik-1                        |                   | 56kb 5' of SEMA3C |                  |

**Fig S5. Haploreg annotations of the noncoding variants in linkage disequilibrium ( $r^2 \geq 0.2$ ) with rs144517871.** Predicted chromatin state is shown per tissue. Effect on regulatory motifs is shown.
